# Supplementary figures and images for: Inflammatory Response Modulation by Vitamin C in an MPTP Mouse Model of Parkinson’s Disease
Source: MDPI journal article supplement (doi:10.3390/biology10111155), 2021-11-09

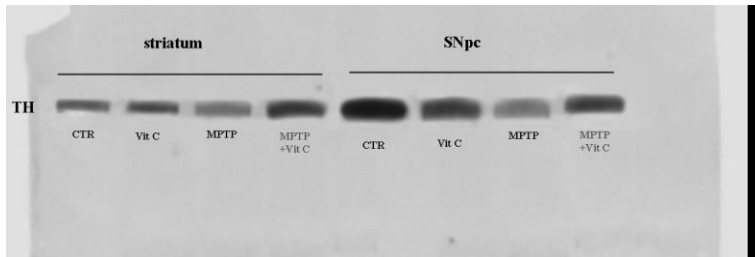

Figure S1

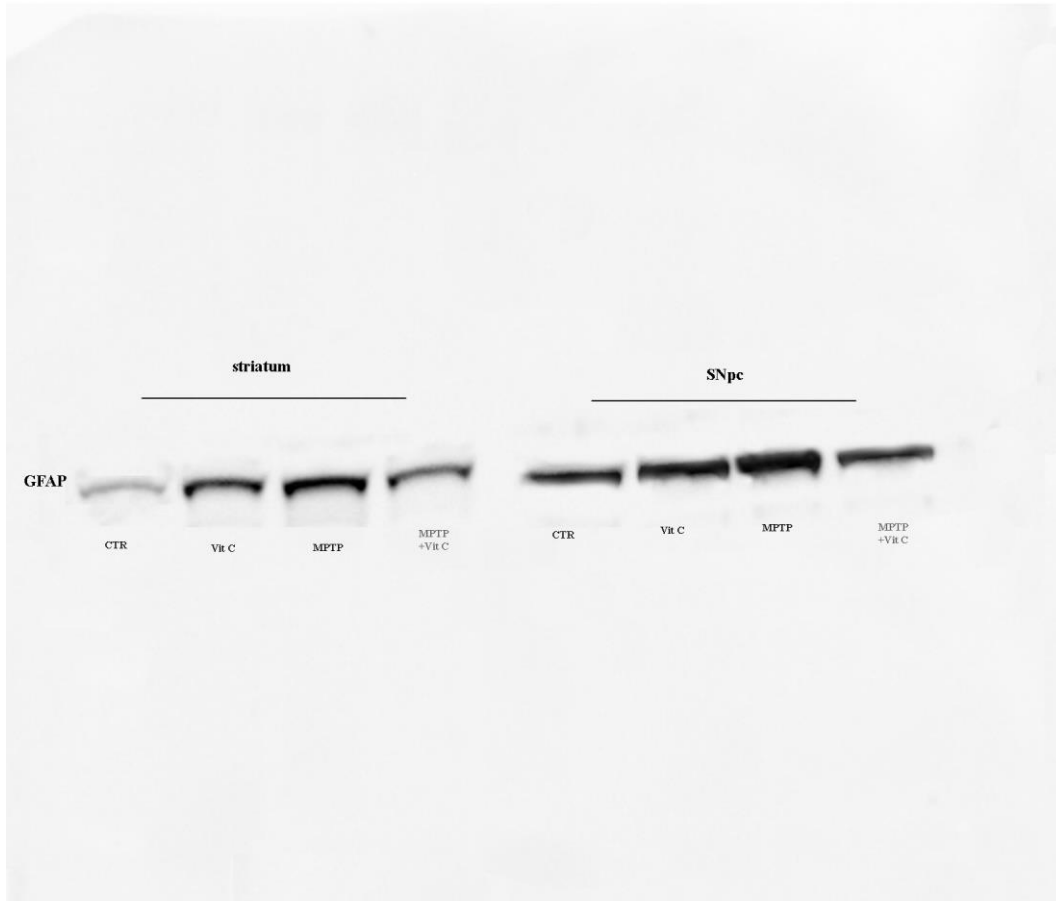

Figure S2

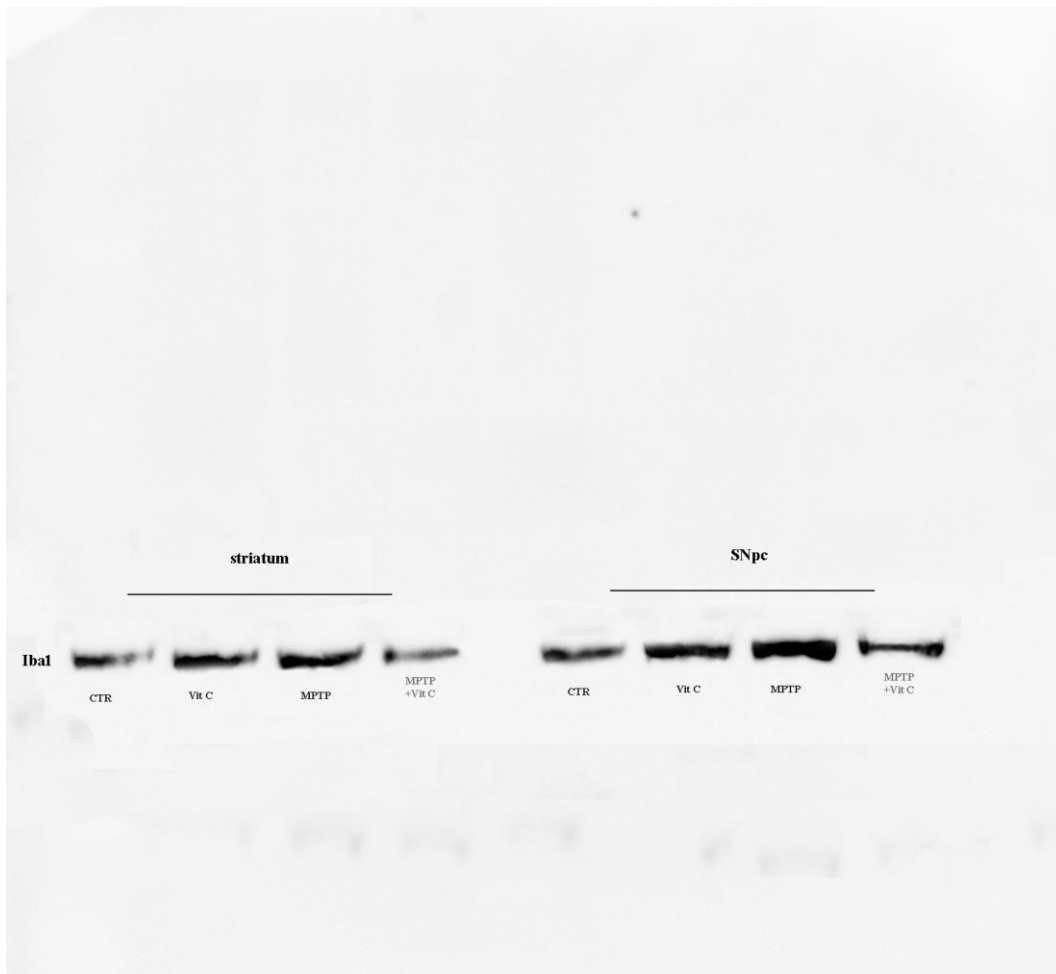

Figure S3

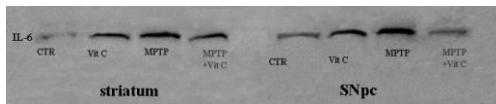

(a)

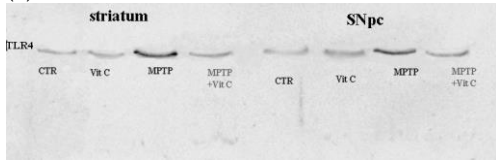

(b)

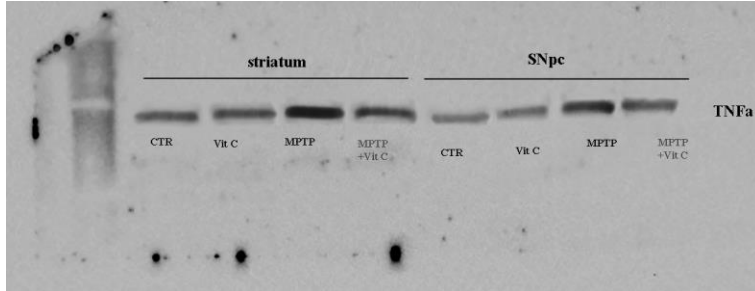

(c)

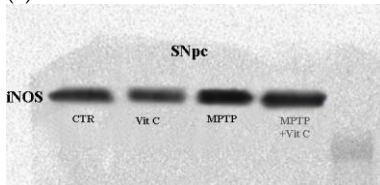

(d) 1

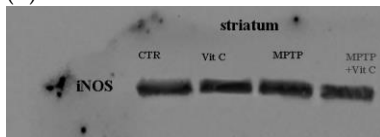

(d) 2

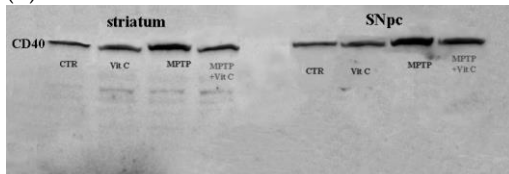

(e)

Figure S4

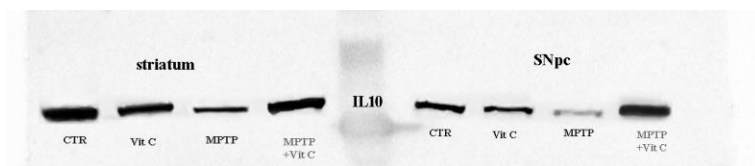

(a)

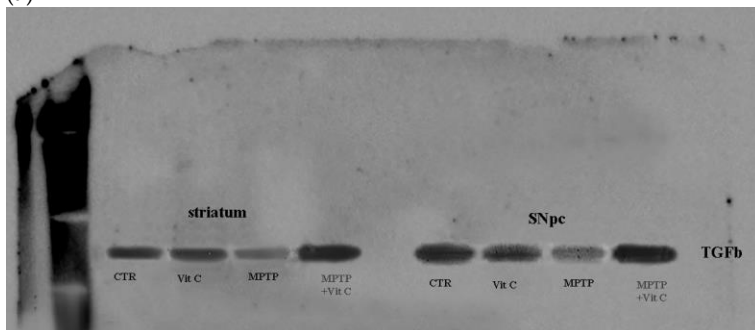

(b)

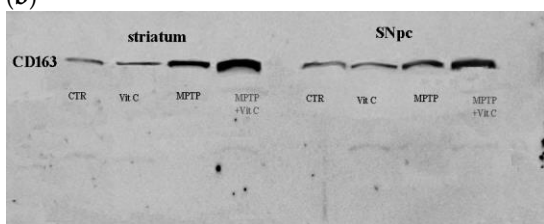

(c)

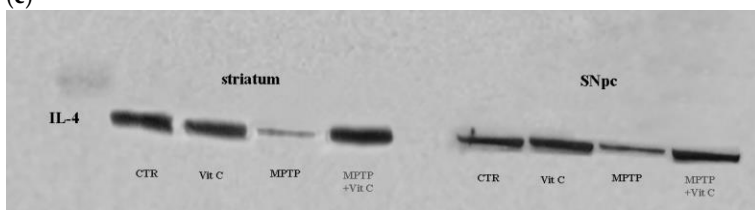

(d)

Figure S5

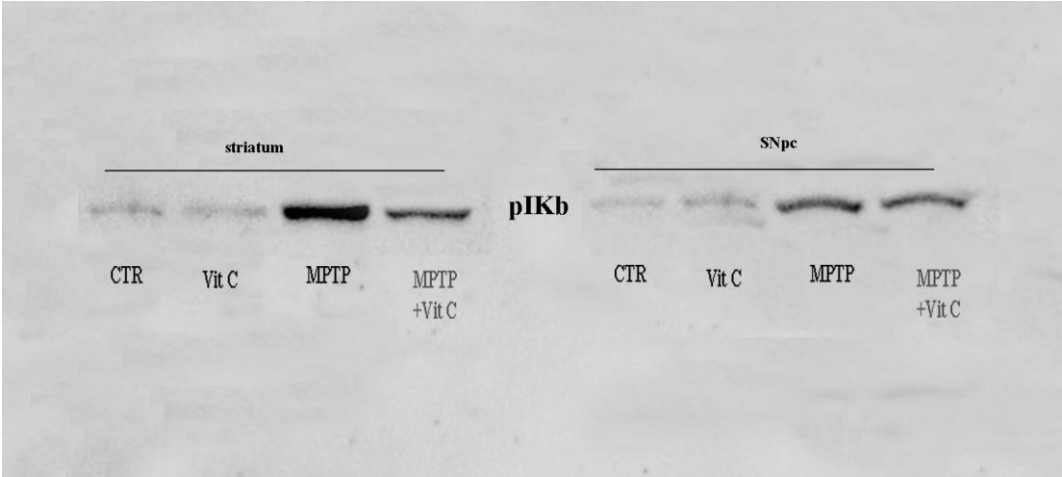

(a)

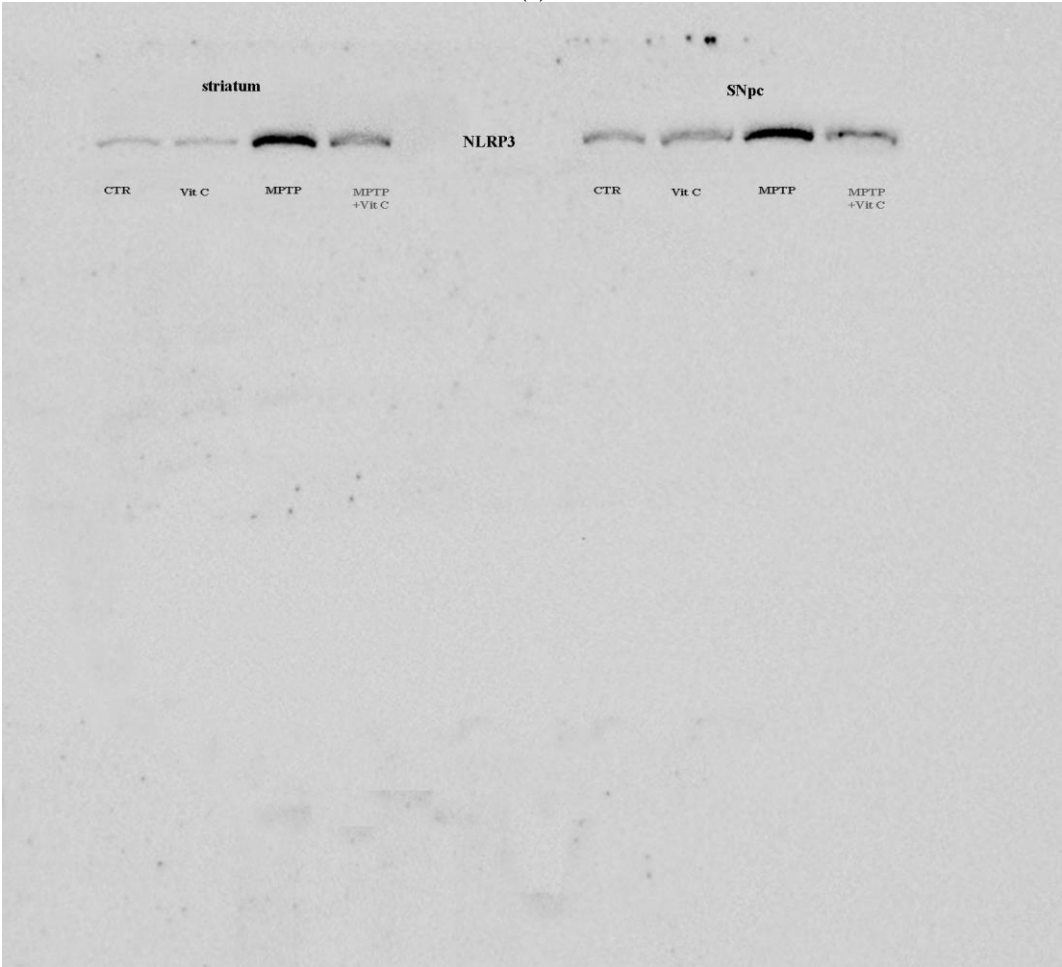

(b)

Figure S6

Supplement: s1 [file s1]
